# Supplementary material for: A Candidate Gene Association Study for Economically Important Traits in Czech Dairy Goat Breeds
Source: MDPI journal article supplement (doi:10.3390/ani11061796), 2021-06-16
Supplement: s1 [file s1]

## Article

# A Candidate Gene Association Study for Economically Important Traits in Czech Dairy Goat Breeds

Michaela Brzáková <sup>1,\*</sup>, Jana Rychtářová <sup>2</sup>, Jindřich Čítek <sup>3,4</sup> and Zuzana Sztankóová <sup>1</sup>

<sup>1</sup> Department of Genetics and Breeding of Farm Animals, Institute of Animal Science, 104 00 Prague, Czech Republic; sztankoova.zuzana@vuzv.cz

<sup>2</sup> Department of Biology of Reproduction, Institute of Animal Science, 104 00 Prague, Czech Republic; rychtarova.jana@vuzv.cz

<sup>3</sup> Department of Genetics and Agricultural Biotechnologies, Faculty of Agriculture, University of South Bohemia, 370 05 Ceske Budejovice, Czech Republic; citek@zf.jcu.cz

<sup>4</sup> Department of Infectious Diseases and Preventive Medicine, Veterinary Research Institute, 621 00 Brno, Czech Republic

\* Correspondence: brzakova.michaela@vuzv.cz; Tel.: +420-606-794059

## Supplementary Material

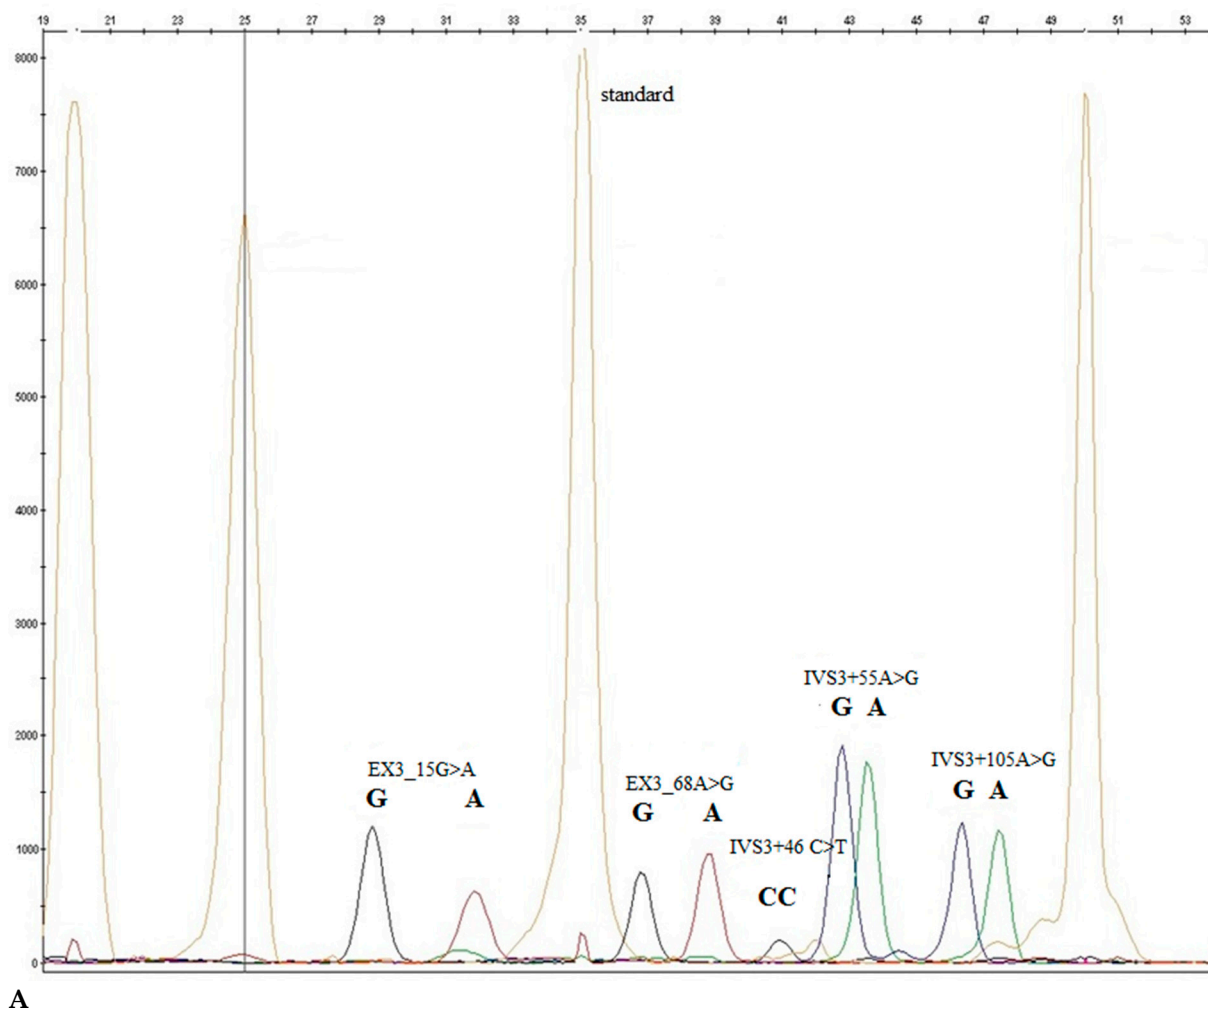

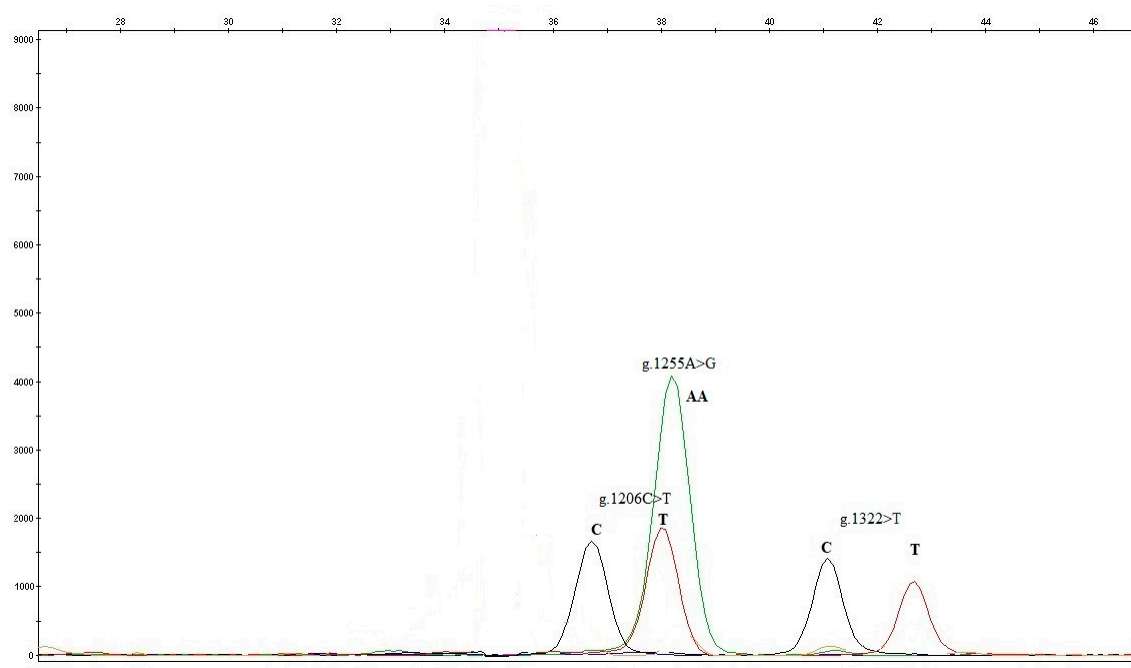

B

**Figure S1.** Electropherograms. (A) Electropherogram of SNPs (AH011188.2; AF422168.1) in the Stearoyl-coenzyme A desaturase (SCD) gene analysed with Gene Mapper software. (B) Electropherogram of SNPs (AJ292286) in the Acetyl-coenzyme A carboxylase  $\alpha$  (ACACA) gene analysed with Gene Mapper software.

**Table S1.** Primers used for the amplification PCR product and extension primers (PEA analysis) of the goat Stearoyl-CoA desaturase (GenBank AH011188.2; AF422168.1), Acetyl-CoA carboxylase (AJ292286) cDNA, and annealing temperature ( $T_m$ )<sup>1</sup>.

| Locus | Primer name and sequence (5'--3')                                                                                                                                                                                                                                                                                          | $T_m$ °C |
|-------|----------------------------------------------------------------------------------------------------------------------------------------------------------------------------------------------------------------------------------------------------------------------------------------------------------------------------|----------|
| ACACA | F: gggCCCCTTTACgTTTCTgT<br>R: AgCTTCTgCCTTAgtCTgCA                                                                                                                                                                                                                                                                         | 59       |
| PEA   | PIII <sup>a</sup> K-ACACA (1206): (AT) <sub>4</sub> ATTTCCCTCTTgACCTgCTCT<br>K-ACACA (1255): gTCTTgTTgTgATTgggTCTCag<br>K-ACACA (1320): (AT) <sub>7</sub> ATTTTCTgggCATAgCTgTCC                                                                                                                                            |          |
| SCD   | F: TCCTAAgCTTATCCAgCCCC<br>R: gCCAgTCACTCagAAgTACCC                                                                                                                                                                                                                                                                        | 59.5     |
| PEA   | Exon3 K – EX3_15G>A: TgCCCAGgggCACTCATCA<br>Exon3 K – EX3_68A>G: (AT) <sub>3</sub> gCAgCCgAgCTTTgTAggT<br>Intron3 K – IVS3+46C>T: (AT) <sub>4</sub> AgCTCTTTTgCTCCTCACTCTTTA T<br>Intron3 K – IVS3+55A>G: (AT) <sub>6</sub> ATCTCCTCACTCTTTATCgATgAgCC<br>Intron3 K – IVS3+105A>G: (AT) <sub>11</sub> AGAgggACAgCACCTggATA |          |

ACACA - Acetyl-CoA carboxylase, SCD - Stearoyl-CoA desaturase, PIII<sup>a</sup> = promotor III – 5'UTR.

**Table S2.** Thermal cycling conditions of Stearoyl-CoA desaturase (SCD) and Acetyl-CoA carboxylase  $\alpha$  (ACACA) loci.

| SCD                | ACACA            |
|--------------------|------------------|
| 95 °C for 4 min    | 95 °C for 2 min  |
| 94 °C for 30 sec   | 95 °C for 30 sec |
| 59,5 °C for 30 sec | 59 °C for 45 sec |
| 72 °C for 40 sec   | 72 °C for 1 min  |
| 72 °C for 10 min.  | 72 °C for 5 min  |
